# Supplementary material for: Influence of electronic effects on one- and two-photon absorption in porphyrin isomers
Source: Royal Society of Chemistry journal article supplement (doi:10.1039/c3ra40790j), 2013-01-01
Supplement: c3ra40790j.pdf [file c3ra40790j.pdf]

## Supporting information for: 'Influence of Electronic Effects on One- and Two-Photon Absorption in Porphyrin Isomers

L. Therese Bergendahl and Martin J. Paterson\*

\*Corresponding Author: [m.j.paterson@hw.ac.uk](mailto:m.j.paterson@hw.ac.uk)

### Optimised Cartesian Coordinates.

---

---

| P |             |             |            |
|---|-------------|-------------|------------|
| C | -1.03798501 | 2.87010627  | 0.00000000 |
| C | -0.60781687 | 4.26469477  | 0.00000000 |
| C | 0.74559521  | 4.24290349  | 0.00000000 |
| C | 1.13067811  | 2.83521083  | 0.00000000 |
| N | 0.03312691  | 2.03105700  | 0.00000000 |
| H | -1.26432786 | 5.12312448  | 0.00000000 |
| H | 1.42943929  | 5.07972287  | 0.00000000 |
| C | 2.45896063  | 2.39887046  | 0.00000000 |
| H | 3.22775997  | 3.16299713  | 0.00000000 |
| C | 2.90931822  | 1.08192303  | 0.00000000 |
| C | 4.26510184  | 0.61594975  | 0.00000000 |
| N | 2.11324611  | -0.03376875 | 0.00000000 |
| C | 4.24263061  | -0.75354633 | 0.00000000 |
| H | 5.13101760  | 1.26038477  | 0.00000000 |
| C | 2.87235808  | -1.17491910 | 0.00000000 |
| H | 1.09996005  | -0.01700928 | 0.00000000 |
| C | -2.37959164 | 2.47662460  | 0.00000000 |
| H | -3.12337439 | 3.26513001  | 0.00000000 |
| C | -2.87235808 | 1.17491910  | 0.00000000 |
| C | -4.24263061 | 0.75354633  | 0.00000000 |
| N | -2.11324611 | 0.03376875  | 0.00000000 |
| C | -4.26510184 | -0.61594975 | 0.00000000 |
| H | -5.08693098 | 1.42602817  | 0.00000000 |
| C | -2.90931822 | -1.08192303 | 0.00000000 |
| H | -1.09996005 | 0.01700928  | 0.00000000 |
| H | -5.13101760 | -1.26038477 | 0.00000000 |
| H | 5.08693098  | -1.42602817 | 0.00000000 |
| C | 2.37959164  | -2.47662460 | 0.00000000 |
| H | 3.12337439  | -3.26513001 | 0.00000000 |
| C | 1.03798501  | -2.87010627 | 0.00000000 |
| C | 0.60781687  | -4.26469477 | 0.00000000 |
| N | -0.03312691 | -2.03105700 | 0.00000000 |
| C | -0.74559521 | -4.24290349 | 0.00000000 |
| H | 1.26432786  | -5.12312448 | 0.00000000 |
| C | -1.13067811 | -2.83521083 | 0.00000000 |
| H | -1.42943929 | -5.07972287 | 0.00000000 |
| C | -2.45896063 | -2.39887046 | 0.00000000 |
| H | -3.22775997 | -3.16299713 | 0.00000000 |

---

---

---

---

**Cis-P**

---

---

|   |             |             |            |
|---|-------------|-------------|------------|
| C | 1.86287400  | 2.31061700  | 0.00000000 |
| C | 1.97840100  | 3.74012500  | 0.00000000 |
| C | 0.72367000  | 4.27422400  | 0.00000000 |
| C | -0.20748000 | 3.19128100  | 0.00000000 |
| N | 0.52470500  | 2.03128300  | 0.00000000 |
| H | 2.92118700  | 4.26888500  | 0.00000000 |
| H | 0.45063500  | 5.31982200  | 0.00000000 |
| C | -1.59466200 | 3.21499100  | 0.00000000 |
| H | -2.07950700 | 4.18483000  | 0.00000000 |
| C | -2.39008700 | 2.06810600  | 0.00000000 |
| C | -3.84454100 | 2.04137000  | 0.00000000 |
| N | -1.87906700 | 0.81422700  | 0.00000000 |
| C | -4.18780400 | 0.73590100  | 0.00000000 |
| H | -4.49135900 | 2.90837100  | 0.00000000 |
| C | -2.93994800 | -0.02295800 | 0.00000000 |
| H | -5.17955200 | 0.30333200  | 0.00000000 |
| C | 2.93550500  | 1.42713100  | 0.00000000 |
| H | 3.91074900  | 1.90148000  | 0.00000000 |
| C | -2.91435400 | -1.41644500 | 0.00000000 |
| H | -3.89164200 | -1.89161600 | 0.00000000 |
| C | 2.96826700  | 0.03762500  | 0.00000000 |
| C | 4.16339300  | -0.75441200 | 0.00000000 |
| N | 1.92200000  | -0.84201200 | 0.00000000 |
| C | 3.80803000  | -2.07137600 | 0.00000000 |
| H | 5.16180800  | -0.34022200 | 0.00000000 |
| C | 2.38169700  | -2.13439000 | 0.00000000 |
| H | 0.90323000  | -0.70858700 | 0.00000000 |
| H | 4.46158300  | -2.93203000 | 0.00000000 |
| C | -1.83391700 | -2.29773800 | 0.00000000 |
| C | -2.00828600 | -3.74779300 | 0.00000000 |
| N | -0.52061000 | -1.98061200 | 0.00000000 |
| C | -0.76961600 | -4.28452000 | 0.00000000 |
| H | -2.96137200 | -4.25996200 | 0.00000000 |
| C | 0.15002300  | -3.15737800 | 0.00000000 |
| H | -0.48740100 | -5.32875500 | 0.00000000 |
| C | 1.54315400  | -3.23991500 | 0.00000000 |
| H | 2.00652800  | -4.22020700 | 0.00000000 |
| H | 0.00000000  | 1.14777900  | 0.00000000 |

---

---

**Pc**

---

---

|   |             |            |            |
|---|-------------|------------|------------|
| C | -0.92950023 | 2.44004789 | 0.00000000 |
| C | -1.95039634 | 3.44298277 | 0.00000000 |
| C | -3.16760927 | 2.79742063 | 0.00000000 |
| C | -2.91797410 | 1.38446866 | 0.00000000 |
| N | -1.55937509 | 1.23026481 | 0.00000000 |
| H | -1.13032498 | 0.28037886 | 0.00000000 |
| H | -1.77432746 | 4.51016179 | 0.00000000 |
| H | -4.15079332 | 3.24966752 | 0.00000000 |
| C | 0.47954976  | 2.54357905 | 0.00000000 |
| C | 1.29057962  | 3.74517414 | 0.00000000 |
| N | 1.25929589  | 1.43787514 | 0.00000000 |

|   |             |             |            |
|---|-------------|-------------|------------|
| C | 2.58767767  | 3.31964529  | 0.00000000 |
| H | 0.92442351  | 4.76395410  | 0.00000000 |
| C | 2.55192484  | 1.86404629  | 0.00000000 |
| H | 3.48482760  | 3.92681039  | 0.00000000 |
| C | -3.86273798 | 0.34056655  | 0.00000000 |
| C | 3.70246894  | 1.04436142  | 0.00000000 |
| C | -3.70246894 | -1.04436142 | 0.00000000 |
| C | 3.86273798  | -0.34056655 | 0.00000000 |
| C | -2.55192484 | -1.86404629 | 0.00000000 |
| C | -2.58767767 | -3.31964529 | 0.00000000 |
| N | -1.25929589 | -1.43787514 | 0.00000000 |
| C | -1.29057962 | -3.74517414 | 0.00000000 |
| H | -3.48482760 | -3.92681039 | 0.00000000 |
| C | -0.47954976 | -2.54357905 | 0.00000000 |
| H | -0.92442351 | -4.76395410 | 0.00000000 |
| C | 2.91797410  | -1.38446866 | 0.00000000 |
| C | 3.16760927  | -2.79742063 | 0.00000000 |
| N | 1.55937509  | -1.23026481 | 0.00000000 |
| C | 1.95039634  | -3.44298277 | 0.00000000 |
| H | 4.15079332  | -3.24966752 | 0.00000000 |
| C | 0.92950023  | -2.44004789 | 0.00000000 |
| H | 1.13032498  | -0.28037886 | 0.00000000 |
| H | 1.77432746  | -4.51016179 | 0.00000000 |
| H | -4.63547976 | -1.60457954 | 0.00000000 |
| H | -4.89322002 | 0.68846343  | 0.00000000 |
| H | 4.89322002  | -0.68846343 | 0.00000000 |
| H | 4.63547976  | 1.60457954  | 0.00000000 |

---

---

**Cis-Pc-1**

---

---

|   |             |             |            |
|---|-------------|-------------|------------|
| C | 2.19986300  | -1.31032200 | 0.00000000 |
| C | 3.02513300  | -2.46734000 | 0.00000000 |
| C | 2.19454600  | -3.56218800 | 0.00000000 |
| C | 0.85138900  | -3.08963200 | 0.00000000 |
| N | 0.91016400  | -1.72553800 | 0.00000000 |
| H | 0.00000000  | -1.17560600 | 0.00000000 |
| H | 4.10546200  | -2.46308100 | 0.00000000 |
| H | 2.48339100  | -4.60379300 | 0.00000000 |
| C | 2.56063300  | 0.05655400  | 0.00000000 |
| C | 3.84885900  | 0.65651800  | 0.00000000 |
| N | 1.64321600  | 1.05377200  | 0.00000000 |
| C | 3.66589700  | 2.01863100  | 0.00000000 |
| H | 4.78692700  | 0.12063500  | 0.00000000 |
| C | 2.26445500  | 2.26960200  | 0.00000000 |
| H | 4.43098100  | 2.78220200  | 0.00000000 |
| C | -0.32487500 | -3.86061800 | 0.00000000 |
| C | 1.62021300  | 3.51983800  | 0.00000000 |
| C | -1.65859800 | -3.49241700 | 0.00000000 |
| C | 0.27796700  | 3.85572100  | 0.00000000 |
| C | -2.25649900 | -2.21551400 | 0.00000000 |
| C | -3.69272400 | -1.97610900 | 0.00000000 |
| N | -1.60051100 | -1.04074500 | 0.00000000 |
| C | -3.86156300 | -0.63181300 | 0.00000000 |
| H | -4.45578700 | -2.74287400 | 0.00000000 |

|   |             |             |            |
|---|-------------|-------------|------------|
| C | -2.52882500 | -0.05672100 | 0.00000000 |
| H | -4.79080600 | -0.07944000 | 0.00000000 |
| C | -0.87138200 | 3.03877100  | 0.00000000 |
| C | -2.23913900 | 3.53845600  | 0.00000000 |
| N | -0.87979600 | 1.69336000  | 0.00000000 |
| C | -3.04866600 | 2.45201300  | 0.00000000 |
| H | -2.52484000 | 4.58179700  | 0.00000000 |
| C | -2.17244400 | 1.29469000  | 0.00000000 |
| H | -4.12946800 | 2.42919500  | 0.00000000 |
| H | -2.36633400 | -4.31645900 | 0.00000000 |
| H | -0.13591600 | -4.93055600 | 0.00000000 |
| H | 0.06750000  | 4.92137200  | 0.00000000 |
| H | 2.31139700  | 4.35814900  | 0.00000000 |
| H | 0.58053600  | 1.02379200  | 0.00000000 |

---

**Cis-Pc-2**

---

|   |             |             |             |
|---|-------------|-------------|-------------|
| C | -2.65784200 | 0.67715600  | -0.11674600 |
| C | -3.65510100 | 1.61836500  | 0.15080300  |
| C | -3.04306400 | 2.86901100  | 0.19285800  |
| C | -1.66715300 | 2.70071800  | -0.04185200 |
| N | -1.47779200 | 1.36190700  | -0.24180200 |
| H | -0.65854300 | 0.88253100  | -0.58691900 |
| H | -4.69684500 | 1.39660600  | 0.33091900  |
| H | -3.51539500 | 3.81730600  | 0.40668200  |
| C | -2.60775800 | -0.74731000 | -0.13754700 |
| C | -3.69919900 | -1.71275900 | -0.01198000 |
| N | -1.42535700 | -1.33063700 | -0.20126400 |
| C | -3.09911900 | -2.92096600 | 0.00458500  |
| H | -4.75451400 | -1.48636300 | 0.05287900  |
| C | -1.65199400 | -2.67434200 | -0.08892900 |
| H | -3.56367200 | -3.89416400 | 0.09438100  |
| C | -0.67800000 | 3.73280200  | -0.01006900 |
| C | -0.71282300 | -3.67889000 | -0.01015100 |
| C | 0.68477600  | 3.73160800  | 0.01019400  |
| C | 0.70616000  | -3.68016300 | 0.01023500  |
| C | 1.67208100  | 2.69775500  | 0.04189800  |
| C | 3.04826900  | 2.86352000  | -0.19296500 |
| N | 1.48027600  | 1.35929400  | 0.24187700  |
| C | 3.65800700  | 1.61174600  | -0.15096000 |
| H | 3.52231200  | 3.81094100  | -0.40687100 |
| C | 2.65905500  | 0.67237300  | 0.11671500  |
| H | 4.69931900  | 1.38807000  | -0.33120600 |
| C | 1.64714000  | -2.67730700 | 0.08899000  |
| C | 3.09381100  | -2.92653800 | -0.00464800 |
| N | 1.42294000  | -1.33319500 | 0.20136500  |
| C | 3.69607100  | -1.71941400 | 0.01186900  |
| H | 3.55660200  | -3.90057000 | -0.09449500 |
| C | 2.60638600  | -0.75199800 | 0.13753700  |
| H | 4.75178600  | -1.49491900 | -0.05308900 |
| H | 1.13900200  | 4.71800000  | -0.01665100 |
| H | -1.13048800 | 4.71999200  | 0.01682300  |
| H | 1.13777600  | -4.67739200 | -0.03981900 |
| H | -1.14623400 | -4.67534100 | 0.03988200  |

H 0.66020200 0.88149700 0.58721700

---

| <b>CPC</b> |             |             |            |
|------------|-------------|-------------|------------|
| C          | -2.61474200 | 0.89392600  | 0.00000000 |
| C          | -4.04293200 | 0.64774600  | 0.00000000 |
| C          | -4.18391100 | -0.70432800 | 0.00000000 |
| C          | -2.84054300 | -1.25454100 | 0.00000000 |
| N          | -1.92606000 | -0.23606700 | 0.00000000 |
| H          | -4.82234700 | 1.39696200  | 0.00000000 |
| H          | -5.10357400 | -1.27393200 | 0.00000000 |
| C          | -1.08636200 | -2.99509700 | 0.00000000 |
| C          | -0.61410900 | -4.32292200 | 0.00000000 |
| N          | 0.01887800  | -2.17401600 | 0.00000000 |
| C          | 0.76330000  | -4.27452200 | 0.00000000 |
| H          | -1.24440000 | -5.20084200 | 0.00000000 |
| C          | 1.15795300  | -2.91573400 | 0.00000000 |
| H          | -0.07620300 | -1.16220600 | 0.00000000 |
| C          | -1.85274400 | 2.10452800  | 0.00000000 |
| C          | -2.11707100 | 3.49012200  | 0.00000000 |
| N          | -0.51292800 | 1.95756900  | 0.00000000 |
| C          | -0.89137500 | 4.14507700  | 0.00000000 |
| H          | -3.09700700 | 3.94447800  | 0.00000000 |
| C          | 0.12057100  | 3.15694400  | 0.00000000 |
| H          | 0.00000000  | 1.07792300  | 0.00000000 |
| H          | -0.72539500 | 5.21300800  | 0.00000000 |
| H          | 1.45137900  | -5.10771700 | 0.00000000 |
| C          | 3.06964600  | 0.04405500  | 0.00000000 |
| C          | 4.24742700  | 0.90340100  | 0.00000000 |
| N          | 1.94789600  | 0.76077600  | 0.00000000 |
| C          | 3.79747300  | 2.17577800  | 0.00000000 |
| H          | 5.27121700  | 0.55427000  | 0.00000000 |
| C          | 2.35258200  | 2.09116000  | 0.00000000 |
| H          | 4.36938400  | 3.09395400  | 0.00000000 |
| C          | 1.52547400  | 3.19722200  | 0.00000000 |
| H          | 2.00053700  | 4.17288500  | 0.00000000 |
| C          | 2.52931600  | -2.52282900 | 0.00000000 |
| H          | 3.15027100  | -3.41537500 | 0.00000000 |
| C          | 3.27191600  | -1.37795000 | 0.00000000 |
| H          | 4.33710500  | -1.59600900 | 0.00000000 |
| C          | -2.42962300 | -2.56600500 | 0.00000000 |
| H          | -3.17893800 | -3.35140500 | 0.00000000 |

---

| <b>Cis-CPC-1</b> |            |            |             |
|------------------|------------|------------|-------------|
| C                | 0.00000000 | 0.71163200 | 2.64379400  |
| C                | 0.00000000 | 1.69181900 | 3.65744500  |
| C                | 0.00000000 | 2.93238900 | 3.03517400  |
| C                | 0.00000000 | 2.71051600 | 1.64111300  |
| N                | 0.00000000 | 1.35935400 | 1.45682400  |
| H                | 0.00000000 | 1.49466200 | 4.71934100  |
| H                | 0.00000000 | 3.90020600 | 3.51591600  |
| C                | 0.00000000 | 3.12030900 | -0.78594500 |

|   |            |             |             |
|---|------------|-------------|-------------|
| C | 0.00000000 | 3.97055300  | -1.95625900 |
| N | 0.00000000 | 1.78577900  | -1.16170900 |
| C | 0.00000000 | 3.13682800  | -3.01926000 |
| H | 0.00000000 | 5.05216100  | -1.94762300 |
| C | 0.00000000 | 1.77648000  | -2.49019700 |
| C | 0.00000000 | -0.71163200 | 2.64379400  |
| C | 0.00000000 | -1.69181900 | 3.65744500  |
| N | 0.00000000 | -1.35935400 | 1.45682400  |
| C | 0.00000000 | -2.93238900 | 3.03517400  |
| H | 0.00000000 | -1.49466200 | 4.71934100  |
| C | 0.00000000 | -2.71051600 | 1.64111300  |
| H | 0.00000000 | -1.00629600 | 0.48711400  |
| H | 0.00000000 | -3.90020600 | 3.51591600  |
| H | 0.00000000 | 3.39386800  | -4.07006800 |
| C | 0.00000000 | -1.77648000 | -2.49019700 |
| C | 0.00000000 | -3.13682800 | -3.01926000 |
| N | 0.00000000 | -1.78577900 | -1.16170900 |
| C | 0.00000000 | -3.97055300 | -1.95625900 |
| H | 0.00000000 | -3.39386800 | -4.07006800 |
| C | 0.00000000 | -3.12030900 | -0.78594500 |
| H | 0.00000000 | -5.05216100 | -1.94762300 |
| C | 0.00000000 | -3.56184400 | 0.52237200  |
| H | 0.00000000 | -4.63222100 | 0.69969500  |
| C | 0.00000000 | 0.68261400  | -3.42075600 |
| H | 0.00000000 | 1.07630800  | -4.43507400 |
| C | 0.00000000 | -0.68261400 | -3.42075600 |
| H | 0.00000000 | -1.07630800 | -4.43507400 |
| C | 0.00000000 | 3.56184400  | 0.52237200  |
| H | 0.00000000 | 4.63222100  | 0.69969500  |
| H | 0.00000000 | 1.00629600  | 0.48711400  |

---

**Cis-CPc-2**

---

|   |             |             |            |
|---|-------------|-------------|------------|
| C | -2.07895100 | 2.12813000  | 0.00000000 |
| C | -3.49252500 | 2.41478400  | 0.00000000 |
| C | -4.10985500 | 1.19500000  | 0.00000000 |
| C | -3.05321800 | 0.19878400  | 0.00000000 |
| N | -1.86092300 | 0.81219100  | 0.00000000 |
| H | -3.95851400 | 3.39042100  | 0.00000000 |
| H | -5.17411600 | 0.99941500  | 0.00000000 |
| C | -2.07118300 | -2.11713500 | 0.00000000 |
| C | -2.37287000 | -3.53554000 | 0.00000000 |
| N | -0.71000700 | -1.91267300 | 0.00000000 |
| C | -1.18637000 | -4.18073300 | 0.00000000 |
| H | -3.36929000 | -3.95733100 | 0.00000000 |
| C | -0.17149700 | -3.14460000 | 0.00000000 |
| C | -0.85435300 | 2.86555700  | 0.00000000 |
| C | -0.35746600 | 4.19578700  | 0.00000000 |
| N | 0.22234100  | 2.05262000  | 0.00000000 |
| C | 1.02192200  | 4.11815200  | 0.00000000 |
| H | -0.95677200 | 5.09417600  | 0.00000000 |
| C | 1.39277400  | 2.73845900  | 0.00000000 |
| H | 0.00000000  | 1.05865200  | 0.00000000 |
| H | 1.71767900  | 4.94566800  | 0.00000000 |

|   |             |             |            |
|---|-------------|-------------|------------|
| H | -0.99602000 | -5.24561800 | 0.00000000 |
| C | 2.82314500  | -1.52242000 | 0.00000000 |
| C | 4.18785300  | -1.13367700 | 0.00000000 |
| N | 2.07042600  | -0.38454900 | 0.00000000 |
| C | 4.23486100  | 0.23170400  | 0.00000000 |
| H | 5.01688300  | -1.82618400 | 0.00000000 |
| C | 2.90505800  | 0.73337900  | 0.00000000 |
| H | 5.11248500  | 0.86283700  | 0.00000000 |
| C | 2.62318800  | 2.10094400  | 0.00000000 |
| H | 3.50096300  | 2.73786500  | 0.00000000 |
| C | 1.19882500  | -3.52118200 | 0.00000000 |
| H | 1.30875600  | -4.60305500 | 0.00000000 |
| C | 2.40641400  | -2.87270800 | 0.00000000 |
| H | 3.26452200  | -3.53889600 | 0.00000000 |
| C | -3.12176000 | -1.19131000 | 0.00000000 |
| H | -4.11517000 | -1.63314400 | 0.00000000 |
| H | 1.05176100  | -0.46617400 | 0.00000000 |

---

---

**Cis-CPc-3**

---

---

|   |            |             |             |
|---|------------|-------------|-------------|
| C | 0.00000000 | 0.71812900  | 2.58300000  |
| C | 0.00000000 | 1.67797200  | 3.67403100  |
| C | 0.00000000 | 2.90784000  | 3.09423600  |
| C | 0.00000000 | 2.67668100  | 1.66085000  |
| N | 0.00000000 | 1.33095100  | 1.41378400  |
| H | 0.00000000 | 1.44560400  | 4.73019800  |
| H | 0.00000000 | 3.87190600  | 3.58500600  |
| C | 0.00000000 | 3.16372200  | -0.74996100 |
| C | 0.00000000 | 3.97070300  | -1.90493600 |
| N | 0.00000000 | 1.85161700  | -1.17055500 |
| C | 0.00000000 | 3.12773200  | -2.99565800 |
| H | 0.00000000 | 5.05143200  | -1.90681200 |
| C | 0.00000000 | 1.78933600  | -2.52837600 |
| C | 0.00000000 | -0.71812900 | 2.58300000  |
| C | 0.00000000 | -1.67797200 | 3.67403100  |
| N | 0.00000000 | -1.33095100 | 1.41378400  |
| C | 0.00000000 | -2.90784000 | 3.09423600  |
| H | 0.00000000 | -1.44560400 | 4.73019800  |
| C | 0.00000000 | -2.67668100 | 1.66085000  |
| H | 0.00000000 | -3.87190600 | 3.58500600  |
| H | 0.00000000 | 3.40582600  | -4.03995100 |
| C | 0.00000000 | -1.78933600 | -2.52837600 |
| C | 0.00000000 | -3.12773200 | -2.99565800 |
| N | 0.00000000 | -1.85161700 | -1.17055500 |
| C | 0.00000000 | -3.97070300 | -1.90493600 |
| H | 0.00000000 | -3.40582600 | -4.03995100 |
| C | 0.00000000 | -3.16372200 | -0.74996100 |
| H | 0.00000000 | -5.05143200 | -1.90681200 |
| C | 0.00000000 | -3.56007900 | 0.60449400  |
| H | 0.00000000 | -4.62797200 | 0.79839100  |
| C | 0.00000000 | 0.68378200  | -3.43481400 |
| H | 0.00000000 | 1.07642600  | -4.44818900 |
| C | 0.00000000 | -0.68378200 | -3.43481400 |
| H | 0.00000000 | -1.07642600 | -4.44818900 |

|   |            |             |             |
|---|------------|-------------|-------------|
| C | 0.00000000 | 3.56007900  | 0.60449400  |
| H | 0.00000000 | 4.62797200  | 0.79839100  |
| H | 0.00000000 | -1.13062300 | -0.43843200 |
| H | 0.00000000 | 1.13062300  | -0.43843200 |

---

---

**HPc**

---

---

|   |             |             |            |
|---|-------------|-------------|------------|
| C | -2.59723500 | -1.72107800 | 0.00000000 |
| C | -3.99887500 | -1.32821100 | 0.00000000 |
| C | -4.01930000 | 0.02784100  | 0.00000000 |
| C | -2.62476000 | 0.44720700  | 0.00000000 |
| N | -1.81420200 | -0.59241000 | 0.00000000 |
| H | -4.84493900 | -2.00225800 | 0.00000000 |
| H | -4.88273700 | 0.67842000  | 0.00000000 |
| C | -2.05451800 | 1.74989000  | 0.00000000 |
| C | -2.61839300 | 3.03634200  | 0.00000000 |
| N | -0.69810500 | 1.89186200  | 0.00000000 |
| C | -1.57095600 | 3.94413000  | 0.00000000 |
| H | -3.67626700 | 3.25541400  | 0.00000000 |
| C | -0.36721100 | 3.20949200  | 0.00000000 |
| H | 0.00000000  | 1.13888000  | 0.00000000 |
| C | -2.03177500 | -2.97424100 | 0.00000000 |
| H | -2.66965500 | -3.85149600 | 0.00000000 |
| C | -0.63115900 | -3.18134100 | 0.00000000 |
| C | 0.12753900  | -4.37651700 | 0.00000000 |
| N | 0.25697200  | -2.14750400 | 0.00000000 |
| C | 1.46144100  | -4.02066700 | 0.00000000 |
| H | -0.28509400 | -5.37530400 | 0.00000000 |
| C | 1.53243700  | -2.60368800 | 0.00000000 |
| H | -0.08638000 | -1.18254300 | 0.00000000 |
| H | 2.31668000  | -4.68149900 | 0.00000000 |
| H | -1.63739700 | 5.02278700  | 0.00000000 |
| C | 2.60801900  | 1.72802400  | 0.00000000 |
| C | 4.04317200  | 1.47377800  | 0.00000000 |
| N | 1.90706100  | 0.58692200  | 0.00000000 |
| C | 4.19298800  | 0.13654300  | 0.00000000 |
| H | 4.80816100  | 2.23825200  | 0.00000000 |
| C | 2.85326700  | -0.42768700 | 0.00000000 |
| H | 5.10732000  | -0.44158900 | 0.00000000 |
| C | 2.68510400  | -1.79597000 | 0.00000000 |
| H | 3.61222200  | -2.36176800 | 0.00000000 |
| C | 0.95451400  | 3.71757800  | 0.00000000 |
| H | 0.99096800  | 4.80360200  | 0.00000000 |
| C | 2.16809700  | 3.09323700  | 0.00000000 |
| H | 3.01067400  | 3.77906300  | 0.00000000 |

---

---

**Cis-HPc 1**

---

---

|   |            |            |            |
|---|------------|------------|------------|
| C | 0.54926500 | 3.12869900 | 0.00000000 |
| C | 1.80698000 | 3.79306400 | 0.00000000 |
| C | 2.79185100 | 2.82793900 | 0.00000000 |
| C | 2.14486800 | 1.56026100 | 0.00000000 |



|   |             |             |            |
|---|-------------|-------------|------------|
| C | 2.63864400  | 0.23158200  | 0.00000000 |
| C | 3.95831400  | -0.25138200 | 0.00000000 |
| C | 3.89097600  | -1.63323700 | 0.00000000 |
| C | 2.52908000  | -1.99678000 | 0.00000000 |
| C | -0.77715400 | 3.56376600  | 0.00000000 |
| C | -1.85244700 | 2.67273500  | 0.00000000 |
| C | -3.26837200 | 2.96353200  | 0.00000000 |
| C | -3.90044100 | 1.75995900  | 0.00000000 |
| C | -2.86042100 | 0.74746200  | 0.00000000 |
| C | -0.56857500 | -3.11692800 | 0.00000000 |
| C | -1.77276700 | -3.93592800 | 0.00000000 |
| C | -2.80952700 | -3.07814800 | 0.00000000 |
| C | -2.24338800 | -1.73584700 | 0.00000000 |
| C | -3.09075700 | -0.64647500 | 0.00000000 |
| C | 1.99597800  | -3.30770500 | 0.00000000 |
| C | 0.70824300  | -3.76165100 | 0.00000000 |
| H | 1.94850800  | 4.86464400  | 0.00000000 |
| H | 3.86031100  | 2.98565700  | 0.00000000 |
| H | 4.84656300  | 0.36342400  | 0.00000000 |
| H | 0.75991500  | -0.87898600 | 0.00000000 |
| H | -0.97473000 | 4.63034900  | 0.00000000 |
| H | -3.71285300 | 3.94965900  | 0.00000000 |
| H | -4.96519500 | 1.56844700  | 0.00000000 |
| H | 4.71670800  | -2.33026400 | 0.00000000 |
| H | -1.78986300 | -5.01728700 | 0.00000000 |
| H | -3.86843600 | -3.29961600 | 0.00000000 |
| H | -4.14374500 | -0.91697100 | 0.00000000 |
| H | 2.76369300  | -4.07656800 | 0.00000000 |
| H | 0.61797800  | -4.84426300 | 0.00000000 |
| H | 0.00000000  | 1.14246000  | 0.00000000 |
| N | 0.82339500  | 1.78632900  | 0.00000000 |
| N | 1.79758200  | -0.84683200 | 0.00000000 |
| N | -1.65784100 | 1.32078500  | 0.00000000 |
| N | -0.86041600 | -1.81031000 | 0.00000000 |

---

**Cis-HPc 2**

---

|   |             |             |            |
|---|-------------|-------------|------------|
| C | 0.28220900  | -3.12995600 | 0.00000000 |
| C | 1.49851300  | -3.93420300 | 0.00000000 |
| C | 2.53517700  | -3.05985100 | 0.00000000 |
| C | 1.94512200  | -1.72450300 | 0.00000000 |
| C | 2.55772900  | -0.45107100 | 0.00000000 |
| C | 3.96630700  | -0.14184700 | 0.00000000 |
| C | 4.04859100  | 1.21476000  | 0.00000000 |
| C | 2.68596200  | 1.70282700  | 0.00000000 |
| C | -1.05209500 | -3.50312000 | 0.00000000 |
| C | -2.08067800 | -2.53944800 | 0.00000000 |
| C | -3.50039200 | -2.66710100 | 0.00000000 |
| C | -4.02831200 | -1.40028300 | 0.00000000 |
| C | -2.94275500 | -0.46878300 | 0.00000000 |
| C | -0.21881300 | 3.21143900  | 0.00000000 |
| C | -1.34908400 | 4.08554200  | 0.00000000 |
| C | -2.46941800 | 3.31655200  | 0.00000000 |
| C | -2.07639500 | 1.93897500  | 0.00000000 |

|   |             |             |            |
|---|-------------|-------------|------------|
| C | -3.02614300 | 0.92330700  | 0.00000000 |
| C | 2.33721600  | 3.06117400  | 0.00000000 |
| C | 1.10509100  | 3.68462600  | 0.00000000 |
| H | 1.54461100  | -5.01498800 | 0.00000000 |
| H | 3.59178100  | -3.28925300 | 0.00000000 |
| H | 4.77529500  | -0.85934400 | 0.00000000 |
| H | -1.32719800 | -4.55163200 | 0.00000000 |
| H | -4.04106400 | -3.60286400 | 0.00000000 |
| H | -5.07370400 | -1.12489700 | 0.00000000 |
| H | 4.93815900  | 1.83054900  | 0.00000000 |
| H | -1.28201800 | 5.16397600  | 0.00000000 |
| H | -3.49935100 | 3.64518500  | 0.00000000 |
| H | -4.04403500 | 1.29973900  | 0.00000000 |
| H | 3.18765300  | 3.73834800  | 0.00000000 |
| H | 1.14332600  | 4.76998100  | 0.00000000 |
| H | 0.00000000  | 1.15141300  | 0.00000000 |
| H | -0.78749500 | -0.95721400 | 0.00000000 |
| N | 0.62245200  | -1.81134900 | 0.00000000 |
| N | 1.81024600  | 0.67254600  | 0.00000000 |
| N | -1.80344600 | -1.20503000 | 0.00000000 |
| N | -0.69110100 | 1.92766000  | 0.00000000 |

---

**Cis-HPc 3**

---

|   |             |             |            |
|---|-------------|-------------|------------|
| C | 1.56895500  | -2.58146800 | 0.00000000 |
| C | 1.29507500  | -4.02021600 | 0.00000000 |
| C | -0.05296800 | -4.15659900 | 0.00000000 |
| C | -0.57878500 | -2.79638900 | 0.00000000 |
| C | -1.90221900 | -2.25016300 | 0.00000000 |
| C | -3.22956500 | -2.69520000 | 0.00000000 |
| C | -4.04052700 | -1.56122000 | 0.00000000 |
| C | -3.20872300 | -0.42221400 | 0.00000000 |
| C | 2.78112100  | -1.94437700 | 0.00000000 |
| C | 2.99332500  | -0.53393500 | 0.00000000 |
| C | 4.32314000  | 0.06352000  | 0.00000000 |
| C | 4.14183600  | 1.40472100  | 0.00000000 |
| C | 2.70458900  | 1.60389200  | 0.00000000 |
| C | -1.56302700 | 2.63007800  | 0.00000000 |
| C | -1.35043500 | 4.03151700  | 0.00000000 |
| C | 0.00181800  | 4.27853600  | 0.00000000 |
| C | 0.65832000  | 3.03366300  | 0.00000000 |
| C | 2.04392600  | 2.81558800  | 0.00000000 |
| C | -3.59038700 | 0.94463900  | 0.00000000 |
| C | -2.90900000 | 2.12938500  | 0.00000000 |
| H | 2.03902300  | -4.80588400 | 0.00000000 |
| H | -0.62985500 | -5.07106500 | 0.00000000 |
| H | -3.55231000 | -3.72596600 | 0.00000000 |
| H | -1.05385400 | -0.40352000 | 0.00000000 |
| H | 3.67623800  | -2.56031800 | 0.00000000 |
| H | 5.25600700  | -0.48486400 | 0.00000000 |
| H | 4.89098000  | 2.18506000  | 0.00000000 |
| H | -5.12107200 | -1.53500200 | 0.00000000 |
| H | -2.14976600 | 4.75842600  | 0.00000000 |
| H | 0.49915700  | 5.23790400  | 0.00000000 |

|   |             |             |            |
|---|-------------|-------------|------------|
| H | 2.64925800  | 3.71716500  | 0.00000000 |
| H | -4.67025500 | 1.06318000  | 0.00000000 |
| H | -3.58232800 | 2.98148400  | 0.00000000 |
| H | 0.00000000  | 1.08662700  | 0.00000000 |
| N | 0.38653400  | -1.89966600 | 0.00000000 |
| N | -1.93826900 | -0.88887900 | 0.00000000 |
| N | 2.04495500  | 0.40695800  | 0.00000000 |
| N | -0.31751300 | 2.05504900  | 0.00000000 |

---

---

**NCP**

---

|   |             |             |             |
|---|-------------|-------------|-------------|
| C | -1.03418900 | 2.78752000  | -0.06002500 |
| C | -0.59494200 | 4.17655700  | -0.10670200 |
| C | 0.75053000  | 4.15052800  | -0.11395500 |
| C | 1.13607500  | 2.74486900  | -0.06996100 |
| N | 0.03993100  | 1.94024700  | -0.04437600 |
| H | -1.25334700 | 5.03460200  | -0.12624600 |
| H | 1.44138100  | 4.98243900  | -0.14045000 |
| C | 2.47779100  | 2.35475600  | -0.04018000 |
| H | 3.21579000  | 3.14890700  | -0.05967100 |
| C | 2.97015000  | 1.05799000  | 0.02205100  |
| C | 4.30147800  | -0.76955200 | 0.09628700  |
| H | 5.19233500  | 1.23954700  | 0.07770200  |
| C | 2.93595700  | -1.20182400 | 0.07595700  |
| H | 1.18268100  | 0.02886200  | -0.09117900 |
| H | 5.14853500  | -1.43985500 | 0.13782900  |
| C | -2.38094400 | 2.44725100  | -0.02048900 |
| H | -3.09011500 | 3.26777700  | -0.02460500 |
| C | 2.43348900  | -2.49208800 | 0.05500500  |
| H | 3.16201800  | -3.29268200 | -0.03089900 |
| C | -2.92696900 | 1.16367600  | 0.03227000  |
| C | -4.28956400 | 0.75172900  | 0.09588600  |
| N | -2.17610000 | 0.02879300  | 0.01732400  |
| C | -4.31263700 | -0.61941200 | 0.09967700  |
| H | -5.13470400 | 1.42412800  | 0.13012000  |
| C | -2.96914200 | -1.09262700 | 0.05125600  |
| H | -1.17777200 | 0.07686000  | -0.13135800 |
| H | -5.18098100 | -1.26121300 | 0.14703400  |
| C | 1.07310900  | -2.82169600 | 0.06729100  |
| C | 0.49350500  | -4.12066300 | -0.28741600 |
| H | 1.06307300  | -5.00844700 | -0.54762200 |
| C | -1.17477900 | -2.79267300 | 0.04451200  |
| C | -2.50869000 | -2.40811100 | 0.01362100  |
| H | -3.24867300 | -3.19221100 | -0.10513400 |
| N | 2.18102500  | -0.05131900 | 0.04113800  |
| C | 4.32484100  | 0.59528100  | 0.06973400  |
| C | -0.03704100 | -2.01035000 | 0.30732800  |
| N | -0.80145200 | -4.11408900 | -0.30053000 |
| H | -0.03221000 | -1.04109300 | 0.77670300  |

---

---

**Trans-N<sub>2</sub>CP(1)**

---

|   |             |             |             |
|---|-------------|-------------|-------------|
| C | 2.76750300  | 1.04102200  | 0.02859700  |
| C | 3.32542000  | 2.33660800  | 0.43354100  |
| C | 1.22859700  | 2.69735100  | 0.04383800  |
| H | 4.35781300  | 2.50383500  | 0.72779900  |
| C | 0.06958000  | 3.46978800  | 0.00625500  |
| H | 0.18958100  | 4.53991800  | 0.13259400  |
| C | -1.22859700 | 2.97169700  | -0.10751600 |
| C | -3.48160600 | 2.72077900  | -0.22182400 |
| H | -2.58187400 | 4.72810200  | -0.28550500 |
| C | -2.89083100 | 1.42591500  | -0.11971100 |
| H | -0.88716200 | 0.93517900  | 0.24486000  |
| H | -4.54370700 | 2.90526700  | -0.29962400 |
| C | 3.47224000  | -0.16363500 | -0.01451700 |
| H | 4.55230400  | -0.13311800 | 0.09133100  |
| C | -3.47224000 | 0.16363500  | -0.01451700 |
| H | -4.55230400 | 0.13311800  | 0.09133100  |
| C | 2.89083100  | -1.42591500 | -0.11971100 |
| C | 3.48160600  | -2.72077900 | -0.22182400 |
| N | 1.53470000  | -1.63508500 | -0.08322100 |
| C | 2.47676600  | -3.65485200 | -0.21415400 |
| H | 4.54370700  | -2.90526700 | -0.29962400 |
| C | 1.22859700  | -2.97169700 | -0.10751600 |
| H | 0.88716200  | -0.93517900 | 0.24486000  |
| H | 2.58187400  | -4.72810200 | -0.28550500 |
| C | -2.76750300 | -1.04102200 | 0.02859700  |
| C | -3.32542000 | -2.33660800 | 0.43354100  |
| H | -4.35781300 | -2.50383500 | 0.72779900  |
| C | -1.22859700 | -2.69735100 | 0.04383800  |
| C | -0.06958000 | -3.46978800 | 0.00625500  |
| H | -0.18958100 | -4.53991800 | 0.13259400  |
| N | -1.53470000 | 1.63508500  | -0.08322100 |
| C | -2.47676600 | 3.65485200  | -0.21415400 |
| C | -1.41574300 | -1.32792300 | -0.22850400 |
| N | -2.45218400 | -3.29082200 | 0.44479700  |
| N | 2.45218400  | 3.29082200  | 0.44479700  |
| C | 1.41574300  | 1.32792300  | -0.22850400 |
| H | -0.73291000 | -0.70367600 | -0.77850300 |
| H | 0.73291000  | 0.70367600  | -0.77850300 |

---

**Trans-N<sub>2</sub>CP(2)**

---

|   |             |             |             |
|---|-------------|-------------|-------------|
| C | -2.74576700 | 1.09211700  | -0.16384900 |
| C | -4.06350600 | 0.52027700  | 0.13745900  |
| C | -2.74040300 | -1.16912200 | -0.12939500 |
| H | -4.95508300 | 1.10014700  | 0.35930700  |
| C | -2.40377000 | -2.52237100 | -0.07769600 |
| H | -3.22403200 | -3.22705000 | 0.00014700  |
| C | -1.10650900 | -3.03271800 | -0.03670400 |
| C | 0.73218400  | -4.36405600 | 0.02615400  |
| H | -1.27650300 | -5.25069900 | -0.10803900 |
| C | 1.16294500  | -3.00277000 | 0.09236300  |
| H | -0.00666100 | -1.25650600 | 0.11769000  |
| H | 1.39700600  | -5.21609500 | 0.03525500  |
| C | -2.44447800 | 2.45665300  | -0.12856100 |
| H | -3.26865700 | 3.15927300  | -0.05291100 |

|   |             |             |             |
|---|-------------|-------------|-------------|
| C | 2.44447800  | -2.45665300 | 0.12856100  |
| H | 3.26865700  | -3.15927300 | 0.05291100  |
| C | -1.16294500 | 3.00277000  | -0.09236300 |
| C | -0.73218400 | 4.36405600  | -0.02615400 |
| N | -0.01662100 | 2.25488900  | -0.05012200 |
| C | 0.63681100  | 4.38231800  | 0.04098600  |
| H | -1.39700600 | 5.21609500  | -0.03525500 |
| C | 1.10650900  | 3.03271800  | 0.03670400  |
| H | 0.00666100  | 1.25650600  | -0.11769000 |
| H | 1.27650300  | 5.25069900  | 0.10803900  |
| C | 2.74576700  | -1.09211700 | 0.16384900  |
| C | 4.06350600  | -0.52027700 | -0.13745900 |
| H | 4.95508300  | -1.10014700 | -0.35930700 |
| C | 2.74040300  | 1.16912200  | 0.12939500  |
| C | 2.40377000  | 2.52237100  | 0.07769600  |
| H | 3.22403200  | 3.22705000  | -0.00014700 |
| N | 0.01662100  | -2.25488900 | 0.05012200  |
| C | -0.63681100 | -4.38231800 | -0.04098600 |
| C | 1.93427800  | 0.03785800  | 0.35743600  |
| N | 4.07073700  | 0.77320600  | -0.15769300 |
| N | -4.07073700 | -0.77320600 | 0.15769300  |
| C | -1.93427800 | -0.03785800 | -0.35743600 |
| H | 0.96398100  | 0.05517700  | 0.83003700  |
| H | -0.96398100 | -0.05517700 | -0.83003700 |

---

---

**cis-N<sub>2</sub>CP(1)**

---

---

|   |             |             |             |
|---|-------------|-------------|-------------|
| C | -0.81919300 | 2.93705400  | -0.11086600 |
| C | -1.98335000 | 3.82094500  | -0.12349700 |
| C | -2.57097600 | 1.64933300  | -0.09930100 |
| H | -1.94135200 | 4.90217900  | -0.13069800 |
| C | -3.43361500 | 0.51271900  | -0.04714400 |
| H | -4.50134800 | 0.69775200  | -0.06413000 |
| C | -3.02824700 | -0.78973800 | 0.04159700  |
| C | -3.03414800 | -3.05843200 | 0.16584000  |
| H | -4.93114400 | -1.97777700 | 0.09884100  |
| C | -1.65278300 | -2.60374100 | 0.14469600  |
| H | -0.97599000 | -0.54862000 | -0.01238300 |
| H | -3.31717400 | -4.10052200 | 0.22193200  |
| C | 0.46592400  | 3.38433000  | -0.06398800 |
| H | 0.60226300  | 4.46137500  | -0.00955800 |
| C | -0.53816400 | -3.38743100 | 0.14276000  |
| H | -0.70499800 | -4.45980100 | 0.12207000  |
| C | 1.65037700  | 2.56922600  | -0.03166200 |
| C | 2.92841200  | 2.95089100  | 0.37030900  |
| H | 3.29939500  | 3.91399600  | 0.68959400  |
| C | 3.00595200  | 0.74626900  | -0.05987300 |
| H | 0.93015400  | 0.61591200  | -0.75604000 |
| H | 4.69098700  | 1.84233000  | 0.65096000  |
| C | 0.81156300  | -2.91088500 | 0.08883400  |
| C | 2.00182600  | -3.67876200 | -0.31844000 |
| H | 2.00135400  | -4.73600400 | -0.57151200 |
| C | 2.68916500  | -1.66516400 | -0.01136800 |
| C | 3.51830600  | -0.59254100 | -0.11782900 |
| H | 4.57407000  | -0.77072200 | -0.30487300 |

|   |             |             |             |
|---|-------------|-------------|-------------|
| N | -1.72661500 | -1.22016800 | 0.08484000  |
| C | -3.85031400 | -1.98672600 | 0.10665000  |
| C | 1.28916200  | -1.65485000 | 0.32881400  |
| N | 3.08886600  | -2.97699200 | -0.35871500 |
| H | 0.76975400  | -0.82228000 | 0.77004000  |
| C | -3.06948400 | 3.02764000  | -0.12223300 |
| H | -4.11248400 | 3.31514600  | -0.12216800 |
| N | -1.24511700 | 1.60646800  | -0.10530700 |
| N | 3.73341400  | 1.86112000  | 0.33864800  |
| C | 1.73003600  | 1.19220300  | -0.33302100 |

---

**cis-N<sub>2</sub>CP(2)**

---

|   |             |             |             |
|---|-------------|-------------|-------------|
| C | 0.81978800  | 2.93699200  | -0.11065500 |
| C | 1.98408500  | 3.82064700  | -0.12341000 |
| C | 2.57131800  | 1.64892600  | -0.09926500 |
| H | 1.94240700  | 4.90189400  | -0.13059000 |
| C | 3.43373100  | 0.51209400  | -0.04737400 |
| H | 4.50150400  | 0.69685200  | -0.06456600 |
| C | 3.02802300  | -0.79025300 | 0.04126100  |
| C | 3.03366500  | -3.05896800 | 0.16551000  |
| H | 4.93079500  | -1.97857900 | 0.09810600  |
| C | 1.65229800  | -2.60407500 | 0.14466300  |
| H | 0.97582600  | -0.54885400 | -0.01207400 |
| H | 3.31657800  | -4.10108800 | 0.22165500  |
| C | -0.46526700 | 3.38433300  | -0.06394400 |
| H | -0.60160900 | 4.46139200  | -0.00969200 |
| C | 0.53757900  | -3.38753200 | 0.14286000  |
| H | 0.70416500  | -4.45994000 | 0.12223800  |
| C | -1.64982900 | 2.56936300  | -0.03160200 |
| C | -2.92792800 | 2.95150800  | 0.36973900  |
| H | -3.29867100 | 3.91474000  | 0.68890100  |
| C | -3.00592600 | 0.74681100  | -0.05980600 |
| H | -0.92989300 | 0.61571000  | -0.75518100 |
| H | -4.69090900 | 1.84353600  | 0.65010200  |
| C | -0.81212600 | -2.91075000 | 0.08916800  |
| C | -2.00254000 | -3.67841600 | -0.31819100 |
| H | -2.00233100 | -4.73562800 | -0.57136600 |
| C | -2.68951300 | -1.66465100 | -0.01117800 |
| C | -3.51843600 | -0.59197400 | -0.11800500 |
| H | -4.57410300 | -0.77013200 | -0.30561800 |
| N | 1.72639500  | -1.22045800 | 0.08481000  |
| C | 3.84996800  | -1.98742000 | 0.10617300  |
| C | -1.28949000 | -1.65468300 | 0.32921400  |
| N | -3.08938100 | -2.97640100 | -0.35875500 |
| H | -0.76993200 | -0.82237900 | 0.77073500  |
| C | 3.07008200  | 3.02714600  | -0.12189000 |
| H | 4.11311200  | 3.31455300  | -0.12171800 |
| N | 1.24547600  | 1.60627900  | -0.10489200 |
| N | -3.73325400 | 1.86197400  | 0.33801800  |
| C | -1.72974700 | 1.19226300  | -0.33246900 |

---

**NeoCP**

---

|   |             |             |             |
|---|-------------|-------------|-------------|
| C | -3.04582900 | -0.05444000 | 0.01798200  |
| C | -4.22928700 | 0.80024800  | 0.00974300  |
| C | -3.77458400 | 2.06895400  | -0.00226200 |
| C | -2.31369700 | 1.98154900  | -0.00178400 |
| N | -1.90147900 | 0.71827700  | 0.01184500  |
| H | -5.25469000 | 0.45496500  | 0.01219800  |
| H | -4.34955600 | 2.98522200  | -0.01317300 |
| C | -1.44462900 | 3.10210600  | -0.01303400 |
| H | -1.89832900 | 4.08677700  | -0.01589400 |
| C | -0.07363700 | 3.05850100  | -0.01590200 |
| C | 0.82666300  | 4.19588200  | -0.00992600 |
| N | 0.72295900  | 1.94280100  | -0.01858300 |
| C | 2.09561500  | 3.73404900  | -0.00684000 |
| H | 0.49540200  | 5.22484000  | -0.00500900 |
| C | 2.05424700  | 2.28508200  | -0.01128200 |
| H | 0.38219000  | 0.98938500  | -0.04280200 |
| C | -3.09958700 | -1.41656600 | 0.02131900  |
| H | -4.06189300 | -1.91396600 | 0.01361900  |
| C | -2.10920400 | -3.66642700 | -0.05360200 |
| C | -0.85313900 | -4.16912100 | -0.06093600 |
| H | -3.07384800 | -4.14787300 | -0.10146400 |
| C | 0.06677900  | -3.05295100 | 0.01277500  |
| H | -0.42092300 | -0.88570600 | 0.14854900  |
| H | -0.58784300 | -5.21513100 | -0.11868800 |
| H | 3.01034600  | 4.31010800  | 0.00111000  |
| C | 3.12583400  | 1.43431600  | -0.00408700 |
| H | 4.10751700  | 1.89542600  | -0.00194500 |
| C | 3.07481300  | 0.01356200  | 0.00380200  |
| C | 4.25586700  | -0.84651100 | 0.00531300  |
| N | 1.95076400  | -0.69500400 | 0.00802300  |
| C | 3.79279000  | -2.11385600 | 0.00782900  |
| H | 5.28276200  | -0.50595400 | 0.00142400  |
| C | 2.33788500  | -2.02019900 | 0.01085600  |
| H | 4.36018500  | -3.03522500 | 0.00904000  |
| C | 1.48761800  | -3.09693600 | 0.00934600  |
| H | 1.94926800  | -4.08104000 | -0.00446300 |
| C | -0.70703800 | -1.91245700 | 0.06979800  |
| N | -2.02159700 | -2.26758000 | 0.02483600  |

---

**Trans-O<sub>2</sub>Pc**

---

|   |             |             |            |
|---|-------------|-------------|------------|
| C | 1.89055983  | 1.87640881  | 0.00000000 |
| C | 3.21492592  | 2.35784723  | 0.00000000 |
| C | 4.04270708  | 1.24699618  | 0.00000000 |
| C | 3.21016107  | 0.10300965  | 0.00000000 |
| H | 3.50644525  | 3.39903464  | 0.00000000 |
| H | 5.12444524  | 1.22986609  | 0.00000000 |
| C | 0.63706911  | 2.51904218  | 0.00000000 |
| C | 0.39618999  | 3.96384272  | 0.00000000 |
| N | -0.51073855 | 1.81827696  | 0.00000000 |
| C | -0.95614490 | 4.09845174  | 0.00000000 |
| H | 1.14493365  | 4.74638917  | 0.00000000 |
| C | -1.50335930 | 2.73389090  | 0.00000000 |
| H | -1.53282855 | 5.01605211  | 0.00000000 |
| C | 3.59273240  | -1.24665565 | 0.00000000 |

|   |             |             |            |
|---|-------------|-------------|------------|
| C | -2.88383136 | 2.44647499  | 0.00000000 |
| C | 2.88383136  | -2.44647499 | 0.00000000 |
| C | -3.59273240 | 1.24665565  | 0.00000000 |
| C | 1.50335930  | -2.73389090 | 0.00000000 |
| C | 0.95614490  | -4.09845174 | 0.00000000 |
| N | 0.51073855  | -1.81827696 | 0.00000000 |
| C | -0.39618999 | -3.96384272 | 0.00000000 |
| H | 1.53282855  | -5.01605211 | 0.00000000 |
| C | -0.63706911 | -2.51904218 | 0.00000000 |
| H | -1.14493365 | -4.74638917 | 0.00000000 |
| C | -3.21016107 | -0.10300965 | 0.00000000 |
| C | -4.04270708 | -1.24699618 | 0.00000000 |
| C | -3.21492592 | -2.35784723 | 0.00000000 |
| H | -5.12444524 | -1.22986609 | 0.00000000 |
| C | -1.89055983 | -1.87640881 | 0.00000000 |
| H | -3.50644525 | -3.39903464 | 0.00000000 |
| H | 3.51813035  | -3.33137964 | 0.00000000 |
| H | 4.67543254  | -1.35603505 | 0.00000000 |
| H | -4.67543254 | 1.35603505  | 0.00000000 |
| H | -3.51813035 | 3.33137964  | 0.00000000 |
| O | -1.91633357 | -0.51674547 | 0.00000000 |
| O | 1.91633357  | 0.51674547  | 0.00000000 |

---

**cis-O<sub>2</sub>Pc (1)**

---

|   |            |             |             |
|---|------------|-------------|-------------|
| C | 0.00000000 | 0.70716600  | -2.55784395 |
| C | 0.00000000 | 1.62484400  | -3.61445995 |
| C | 0.00000000 | 2.88866100  | -3.03220195 |
| C | 0.00000000 | 2.71313100  | -1.63682495 |
| C | 0.00000000 | -0.70716600 | -2.55784395 |
| C | 0.00000000 | -1.62484400 | -3.61445995 |
| C | 0.00000000 | -2.88866100 | -3.03220195 |
| C | 0.00000000 | -2.71313100 | -1.63682495 |
| C | 0.00000000 | 3.72744300  | -0.65312495 |
| C | 0.00000000 | -3.72744300 | -0.65312495 |
| C | 0.00000000 | 3.74579200  | 0.73185105  |
| C | 0.00000000 | -3.74579200 | 0.73185105  |
| C | 0.00000000 | 2.68683400  | 1.67375205  |
| C | 0.00000000 | 2.86493800  | 3.13982805  |
| N | 0.00000000 | 1.39230600  | 1.34443005  |
| C | 0.00000000 | 1.61394800  | 3.66505105  |
| C | 0.00000000 | 0.70148900  | 2.51206005  |
| C | 0.00000000 | -2.68683400 | 1.67375205  |
| C | 0.00000000 | -2.86493800 | 3.13982805  |
| C | 0.00000000 | -1.61394800 | 3.66505105  |
| C | 0.00000000 | -0.70148900 | 2.51206005  |
| O | 0.00000000 | 1.37303200  | -1.37493995 |
| O | 0.00000000 | -1.37303200 | -1.37493995 |
| N | 0.00000000 | -1.39230600 | 1.34443005  |
| H | 0.00000000 | 1.38253400  | -4.66820095 |
| H | 0.00000000 | 3.84419200  | -3.53918495 |
| H | 0.00000000 | -1.38253400 | -4.66820095 |
| H | 0.00000000 | -3.84419200 | -3.53918495 |
| H | 0.00000000 | 3.81128900  | 3.66839105  |



|   |            |             |             |
|---|------------|-------------|-------------|
| H | 0.00000000 | 1.32972300  | 4.71000905  |
| H | 0.00000000 | -3.81128900 | 3.66839105  |
| H | 0.00000000 | -1.32972300 | 4.71000905  |
| H | 0.00000000 | 4.74317100  | 1.16783705  |
| H | 0.00000000 | 4.71141000  | -1.11886095 |
| H | 0.00000000 | -4.74317100 | 1.16783705  |
| H | 0.00000000 | -4.71141000 | -1.11886095 |

---

**cis-O<sub>2</sub>Pc (2)**

---

|   |            |             |             |
|---|------------|-------------|-------------|
| C | 0.00000000 | 2.58975600  | -0.67993600 |
| C | 0.00000000 | 3.64732000  | -1.59592400 |
| C | 0.00000000 | 3.07907800  | -2.86761600 |
| C | 0.00000000 | 1.68477500  | -2.69729700 |
| C | 0.00000000 | 2.53923500  | 0.73582500  |
| C | 0.00000000 | 3.67331300  | 1.67294400  |
| C | 0.00000000 | 3.10806200  | 2.90728400  |
| C | 0.00000000 | 1.64776900  | 2.69519000  |
| C | 0.00000000 | 0.69122700  | -3.69954000 |
| C | 0.00000000 | 0.70465900  | 3.72957800  |
| C | 0.00000000 | -0.69122700 | -3.69954000 |
| C | 0.00000000 | -0.70465900 | 3.72957800  |
| C | 0.00000000 | -1.68477500 | -2.69729700 |
| C | 0.00000000 | -3.07907800 | -2.86761600 |
| C | 0.00000000 | -3.64732000 | -1.59592400 |
| C | 0.00000000 | -2.58975600 | -0.67993600 |
| C | 0.00000000 | -1.64776900 | 2.69519000  |
| C | 0.00000000 | -3.10806200 | 2.90728400  |
| C | 0.00000000 | -3.67331300 | 1.67294400  |
| C | 0.00000000 | -2.53923500 | 0.73582500  |
| O | 0.00000000 | 1.40661200  | -1.36610500 |
| N | 0.00000000 | -1.36724000 | 1.36663800  |
| O | 0.00000000 | -1.40661200 | -1.36610500 |
| N | 0.00000000 | 1.36724000  | 1.36663800  |
| H | 0.00000000 | 4.69844100  | -1.34290000 |
| H | 0.00000000 | 3.59246200  | -3.81977100 |
| H | 0.00000000 | 4.72695100  | 1.42135800  |
| H | 0.00000000 | 3.61139500  | 3.86715500  |
| H | 0.00000000 | -3.59246200 | -3.81977100 |
| H | 0.00000000 | -4.69844100 | -1.34290000 |
| H | 0.00000000 | -3.61139500 | 3.86715500  |
| H | 0.00000000 | -4.72695100 | 1.42135800  |
| H | 0.00000000 | -1.13519500 | -4.69255700 |
| H | 0.00000000 | 1.13519500  | -4.69255700 |
| H | 0.00000000 | -1.14507100 | 4.72604100  |
| H | 0.00000000 | 1.14507100  | 4.72604100  |

---

**trans-O<sub>2</sub>N7Pc**

---

|   |            |            |            |
|---|------------|------------|------------|
| C | 1.91521426 | 1.86795930 | 0.00000000 |
| C | 3.23909327 | 2.34767240 | 0.00000000 |
| C | 4.06485252 | 1.23320792 | 0.00000000 |
| C | 3.22979905 | 0.09177800 | 0.00000000 |

|   |             |             |            |
|---|-------------|-------------|------------|
| H | 3.53364655  | 3.38810147  | 0.00000000 |
| H | 5.14656276  | 1.21468092  | 0.00000000 |
| C | 0.65120166  | 2.49001236  | 0.00000000 |
| C | 0.31444873  | 3.91391703  | 0.00000000 |
| N | -0.48936942 | 1.78421846  | 0.00000000 |
| H | 0.99215067  | 4.76199921  | 0.00000000 |
| C | -1.45742409 | 2.71668972  | 0.00000000 |
| C | 3.59498485  | -1.26229581 | 0.00000000 |
| C | -2.84668789 | 2.47775968  | 0.00000000 |
| C | 2.86596626  | -2.45065927 | 0.00000000 |
| C | -3.57997417 | 1.29438921  | 0.00000000 |
| C | 1.48123603  | -2.72138459 | 0.00000000 |
| C | 0.92439261  | -4.08399959 | 0.00000000 |
| N | 0.49456143  | -1.79988937 | 0.00000000 |
| C | -0.42608397 | -3.94131432 | 0.00000000 |
| H | 1.49579393  | -5.00482293 | 0.00000000 |
| C | -0.65836471 | -2.49392552 | 0.00000000 |
| H | -1.17962814 | -4.71915668 | 0.00000000 |
| C | -3.21470589 | -0.06153157 | 0.00000000 |
| C | -4.05655525 | -1.19949147 | 0.00000000 |
| C | -3.23714892 | -2.31643358 | 0.00000000 |
| H | -5.13808977 | -1.17412333 | 0.00000000 |
| C | -1.90827168 | -1.84520874 | 0.00000000 |
| H | -3.53732756 | -3.35516515 | 0.00000000 |
| H | 3.48665207  | -3.34496605 | 0.00000000 |
| H | 4.67572808  | -1.38908968 | 0.00000000 |
| H | -4.66023740 | 1.42332327  | 0.00000000 |
| H | -3.43604164 | 3.39074219  | 0.00000000 |
| O | -1.92530293 | -0.48568521 | 0.00000000 |
| O | 1.93740595  | 0.50977546  | 0.00000000 |
| N | -0.98403054 | 4.05465774  | 0.00000000 |

---

**cis-O<sub>2</sub>N7Pc (1)**

---

|   |             |             |            |
|---|-------------|-------------|------------|
| C | 1.39786678  | -2.26986984 | 0.00000000 |
| C | 2.56773137  | -3.03364746 | 0.00000000 |
| C | 3.62460186  | -2.12357402 | 0.00000000 |
| C | 3.07157154  | -0.83303373 | 0.00000000 |
| H | 2.62483580  | -4.11332349 | 0.00000000 |
| H | 4.68246474  | -2.34915259 | 0.00000000 |
| C | 0.03046658  | -2.63745611 | 0.00000000 |
| C | -0.63786807 | -3.86081075 | 0.00000000 |
| H | -0.21068560 | -4.85492298 | 0.00000000 |
| C | -2.11938525 | -2.32110896 | 0.00000000 |
| C | 3.76673120  | 0.39899590  | 0.00000000 |
| C | -3.38881491 | -1.68410129 | 0.00000000 |
| C | 3.39018691  | 1.72998310  | 0.00000000 |
| C | -3.79797021 | -0.36702507 | 0.00000000 |
| C | 2.10518823  | 2.33545579  | 0.00000000 |
| C | 1.87094801  | 3.79665391  | 0.00000000 |
| N | 0.95529587  | 1.66195740  | 0.00000000 |
| C | 0.52515109  | 3.95639463  | 0.00000000 |
| H | 2.63508942  | 4.56535050  | 0.00000000 |
| C | -0.03438063 | 2.59562293  | 0.00000000 |
| H | -0.03721341 | 4.88159293  | 0.00000000 |

|   |             |             |            |
|---|-------------|-------------|------------|
| C | -3.04730056 | 0.84305053  | 0.00000000 |
| C | -3.63188384 | 2.19983784  | 0.00000000 |
| C | -2.57986738 | 3.05700128  | 0.00000000 |
| H | -4.68875371 | 2.44021340  | 0.00000000 |
| C | -1.37971984 | 2.20953664  | 0.00000000 |
| H | -2.60264181 | 4.13952429  | 0.00000000 |
| H | 4.22150928  | 2.43237166  | 0.00000000 |
| H | 4.84244611  | 0.23170433  | 0.00000000 |
| H | -4.87795814 | -0.23148549 | 0.00000000 |
| H | -4.17733531 | -2.43134987 | 0.00000000 |
| O | 1.71129248  | -0.95038600 | 0.00000000 |
| O | -0.92428990 | -1.67059260 | 0.00000000 |
| N | -1.71673454 | 0.89077382  | 0.00000000 |
| N | -1.96817496 | -3.65189204 | 0.00000000 |

---

**cis-O<sub>2</sub>N<sub>7</sub>Pc (2)**

---

|   |             |             |            |
|---|-------------|-------------|------------|
| C | -1.89143674 | -1.91494040 | 0.00000000 |
| C | -3.20940491 | -2.38221491 | 0.00000000 |
| C | -4.03416750 | -1.25821161 | 0.00000000 |
| C | -3.19709608 | -0.13048292 | 0.00000000 |
| H | -3.51005429 | -3.42084980 | 0.00000000 |
| H | -5.11561149 | -1.23519221 | 0.00000000 |
| C | -0.62461097 | -2.54712387 | 0.00000000 |
| C | -0.26585950 | -3.97334900 | 0.00000000 |
| H | -0.92976282 | -4.83254176 | 0.00000000 |
| C | 1.48949696  | -2.74192765 | 0.00000000 |
| C | -3.56431458 | 1.23160922  | 0.00000000 |
| C | 2.86382405  | -2.47648316 | 0.00000000 |
| C | -2.86406914 | 2.42418996  | 0.00000000 |
| C | 3.58303750  | -1.26620342 | 0.00000000 |
| C | -1.49770000 | 2.78031445  | 0.00000000 |
| C | -0.95207853 | 4.07588625  | 0.00000000 |
| C | 0.43282542  | 3.93778574  | 0.00000000 |
| H | -1.52331419 | 4.99446546  | 0.00000000 |
| C | 0.70351392  | 2.56449164  | 0.00000000 |
| H | 1.17411771  | 4.72481747  | 0.00000000 |
| C | 3.16337700  | 0.07076873  | 0.00000000 |
| C | 4.07573542  | 1.23293940  | 0.00000000 |
| C | 3.28691283  | 2.33727369  | 0.00000000 |
| H | 5.15865541  | 1.19144100  | 0.00000000 |
| C | 1.90779464  | 1.82027320  | 0.00000000 |
| H | 3.59337622  | 3.37616657  | 0.00000000 |
| H | -3.49722681 | 3.30870819  | 0.00000000 |
| H | -4.64555453 | 1.35025962  | 0.00000000 |
| H | 4.66466245  | -1.39271682 | 0.00000000 |
| H | 3.47031572  | -3.37894038 | 0.00000000 |
| O | -1.90295823 | -0.54779840 | 0.00000000 |
| N | 1.87380715  | 0.48978621  | 0.00000000 |
| O | -0.48084134 | 1.87714808  | 0.00000000 |
| N | 0.49332429  | -1.82999428 | 0.00000000 |
| N | 1.03231346  | -4.09236148 | 0.00000000 |

---
